# Supplementary material for: A quantitative, high-throughput method identifies protein–glycan interactions via mass spectrometry
Source: PubMed Central journal article supplement (PMC6646405; doi:10.1038/s42003-019-0507-2), 2019-07-22
Supplement: 42003_2019_507_MOESM2_ESM.pdf [file 42003_2019_507_MOESM2_ESM.pdf]

## Supplementary Figures

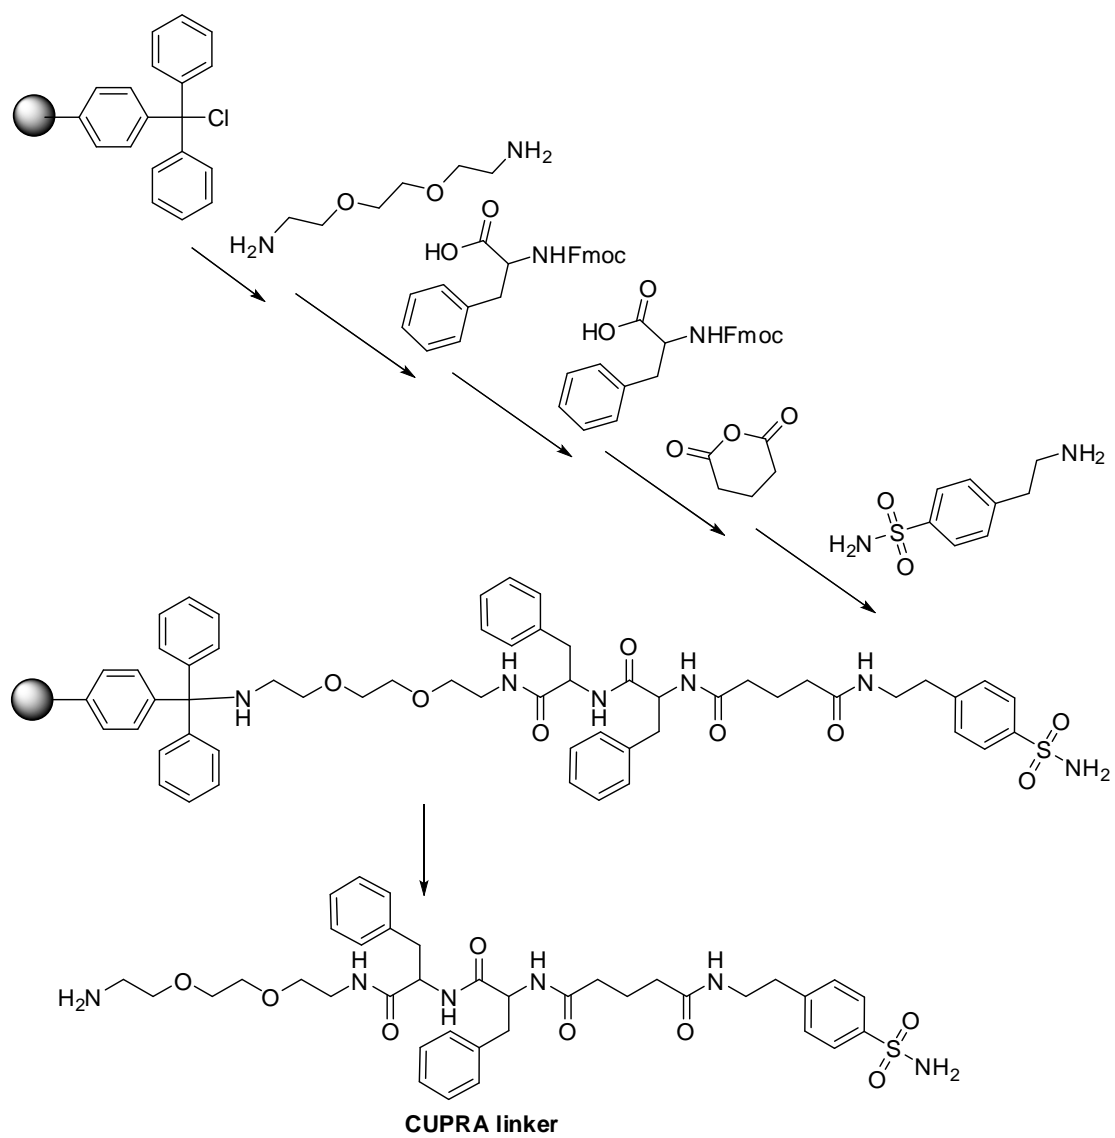

**Supplementary Figure 1.** Scheme of solid-phase assisted synthesis of CUPRA linker.

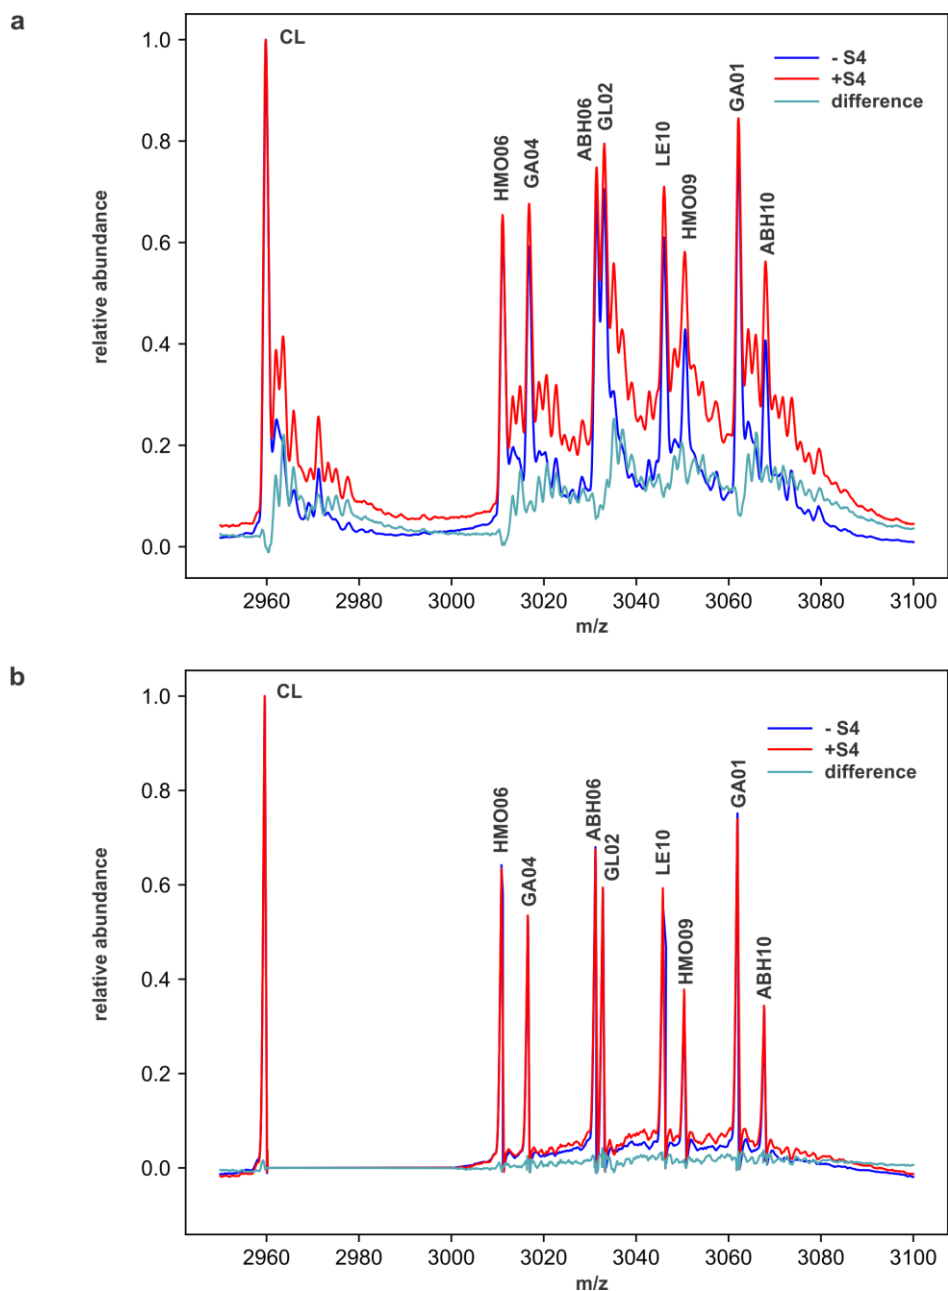

**Supplementary Figure 2.** Application of SWARM for adduct subtraction from ESI mass spectra. (a) Portion of ESI mass spectrum acquired for an aqueous ammonium acetate (200 mM, pH 7) solution of  $\text{UniP}_{\text{proxy}}$  (3  $\mu\text{M}$ ), a subset of the  $\text{OS}^{\text{mod}}$  library (3  $\mu\text{M}$  each) and CUPRA linker (CL 3  $\mu\text{M}$ ) in the absence (red trace) and presence (blue trace) of  $\text{S}_4$  (50  $\mu\text{M}$ ). Cyan trace corresponds to difference between these two mass spectra. (b) Data from (a) after treatment with SWARM.

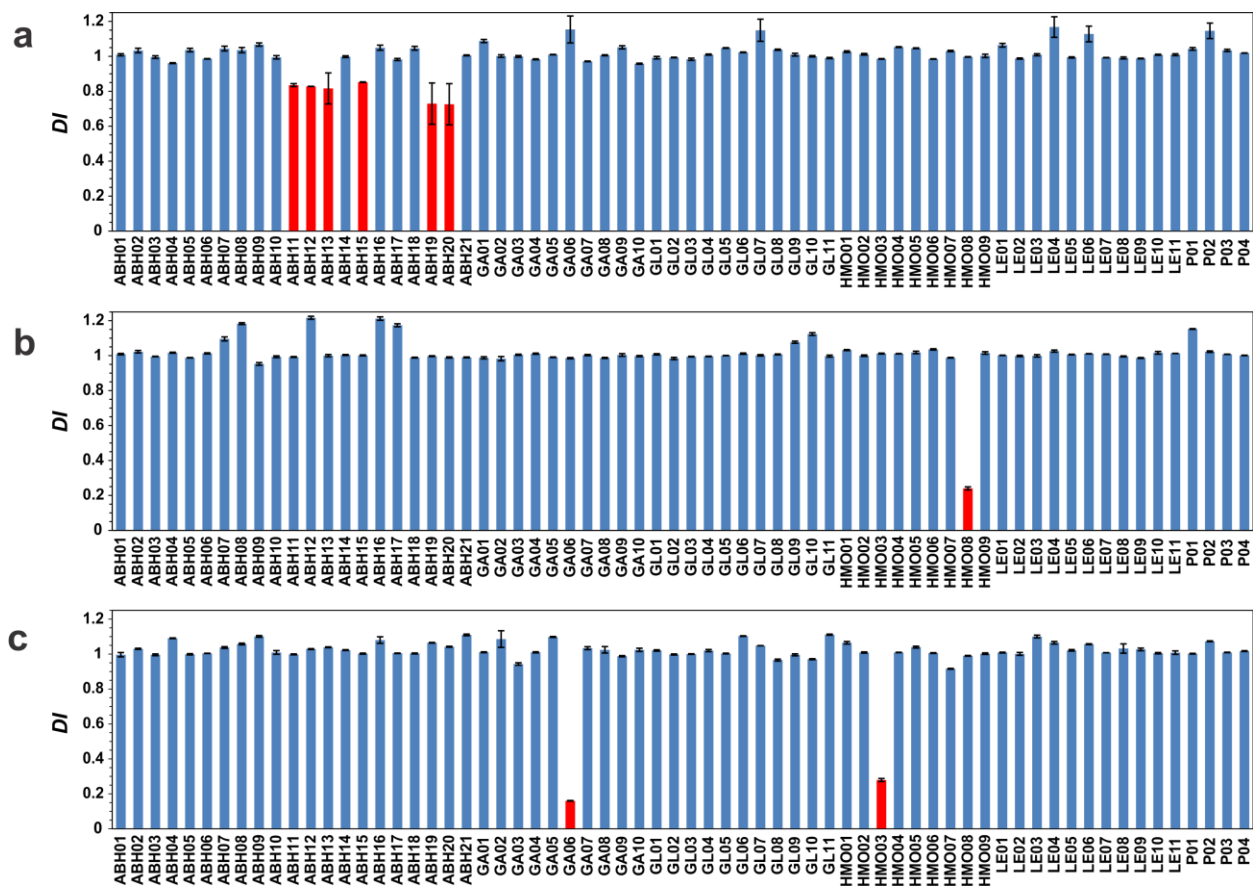

**Supplementary Figure 3.** CUPRA screening results for CBM51, SNA, and MAA. Depletion index ( $DI$ ) for each  $OS^{mod}$  measured in 200 mM aqueous ammonium acetate (pH 7) for: (a) CBM51 (25  $\mu$ M, 25  $^{\circ}$ C), (b) SNA (5  $\mu$ M, 25  $^{\circ}$ C), (c) MAA (50  $\mu$ M, 25  $^{\circ}$ C). Data shown in red indicate ligands identified from screening. Error bars represent standard deviations calculated for  $n=4$  independent experiments.

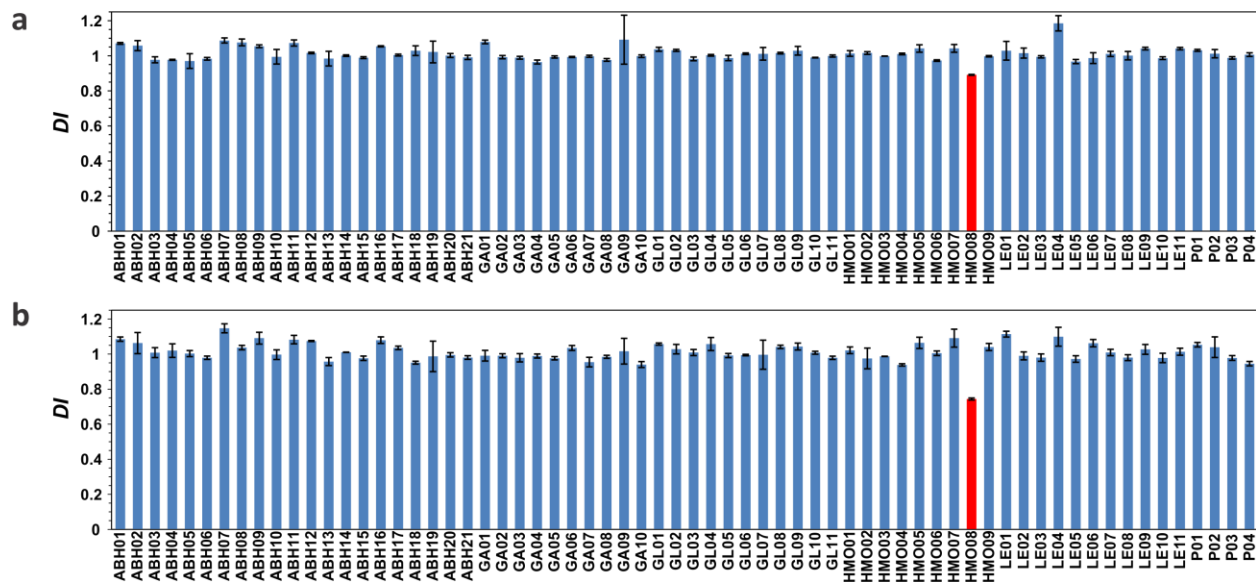

**Supplementary Figure 4.** CUPRA screening results for siglec-2. Depletion index ( $DI$ ) for each  $OS^{mod}$  measured in 200 mM aqueous ammonium acetate (pH 7) for siglec-2 (23  $\mu$ M) at: (a) 25  $^{\circ}$ C and (b) 0  $^{\circ}$ C. Data shown in red indicate ligands identified from screening. Error bars represent standard deviations calculated for n=4 independent experiments.

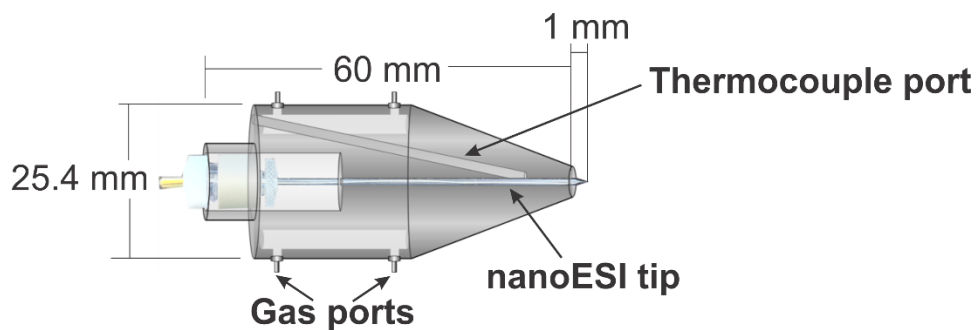

**Supplementary Figure 5.** Schematic of home-built temperature-controlled nanoESI device. The nanoESI tip is inserted into the central channel of the aluminum device through a small aperture 1.2 mm (i.d.). The tip is positioned such that ~1 mm of the tapered end protrudes from the end of the device. The temperature of the device was regulated by varying the flow rate of nitrogen gas that first passes through a U-tube in contact with a dry ice/ethanol bath and then through two symmetric gas flow channels at the outer edges of the device. The temperature of the device was measured by a thermocouple introduced through the angled channel and placed in proximity to the end of the nanoESI tip.

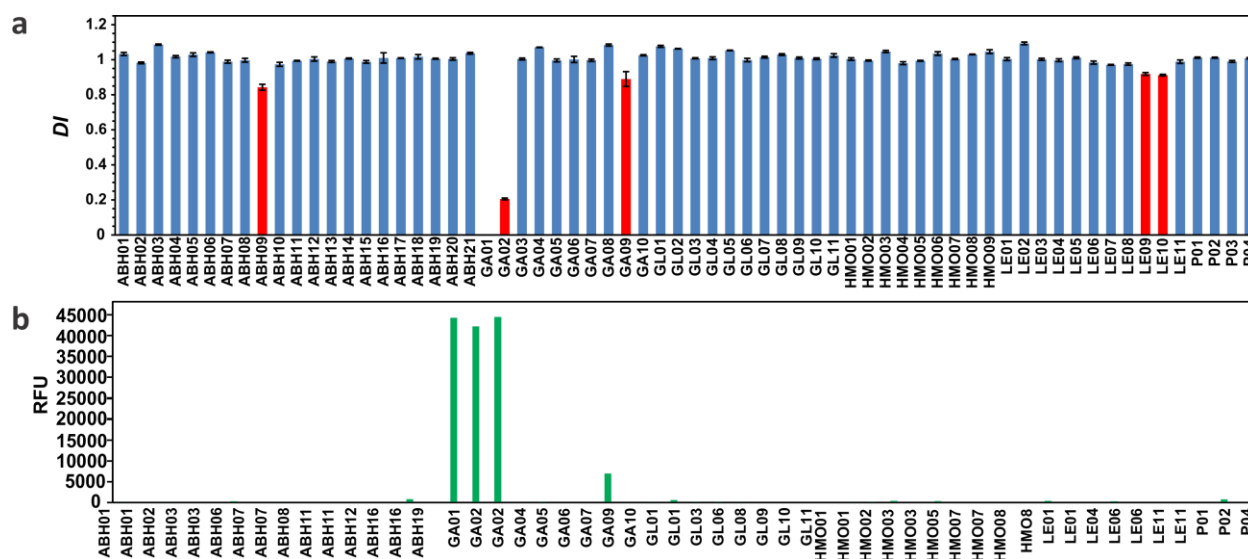

**Supplementary Figure 6.** Comparison of variable temperature CUPRA screening results with glycan array data for CTB<sub>5</sub>: (a) Depletion index (*DI*) for each OS<sup>mod</sup> measured in 200 mM aqueous ammonium acetate (pH 7) for CTB<sub>5</sub> (10 μM). Data shown in red indicate ligands identified from screening. Error bars represent standard deviations calculated for n=4 independent experiments. (b) Partial readout in relative fluorescence units (RFU) of CFG array (entry CTB\_14501\_10ug\_v5.0\_DATA.xls) screened against CTB<sub>5</sub> (only compounds containing glycans found in CUPRA library are shown). CUPRA codes instead of CFG codes are used for ease of comparison.

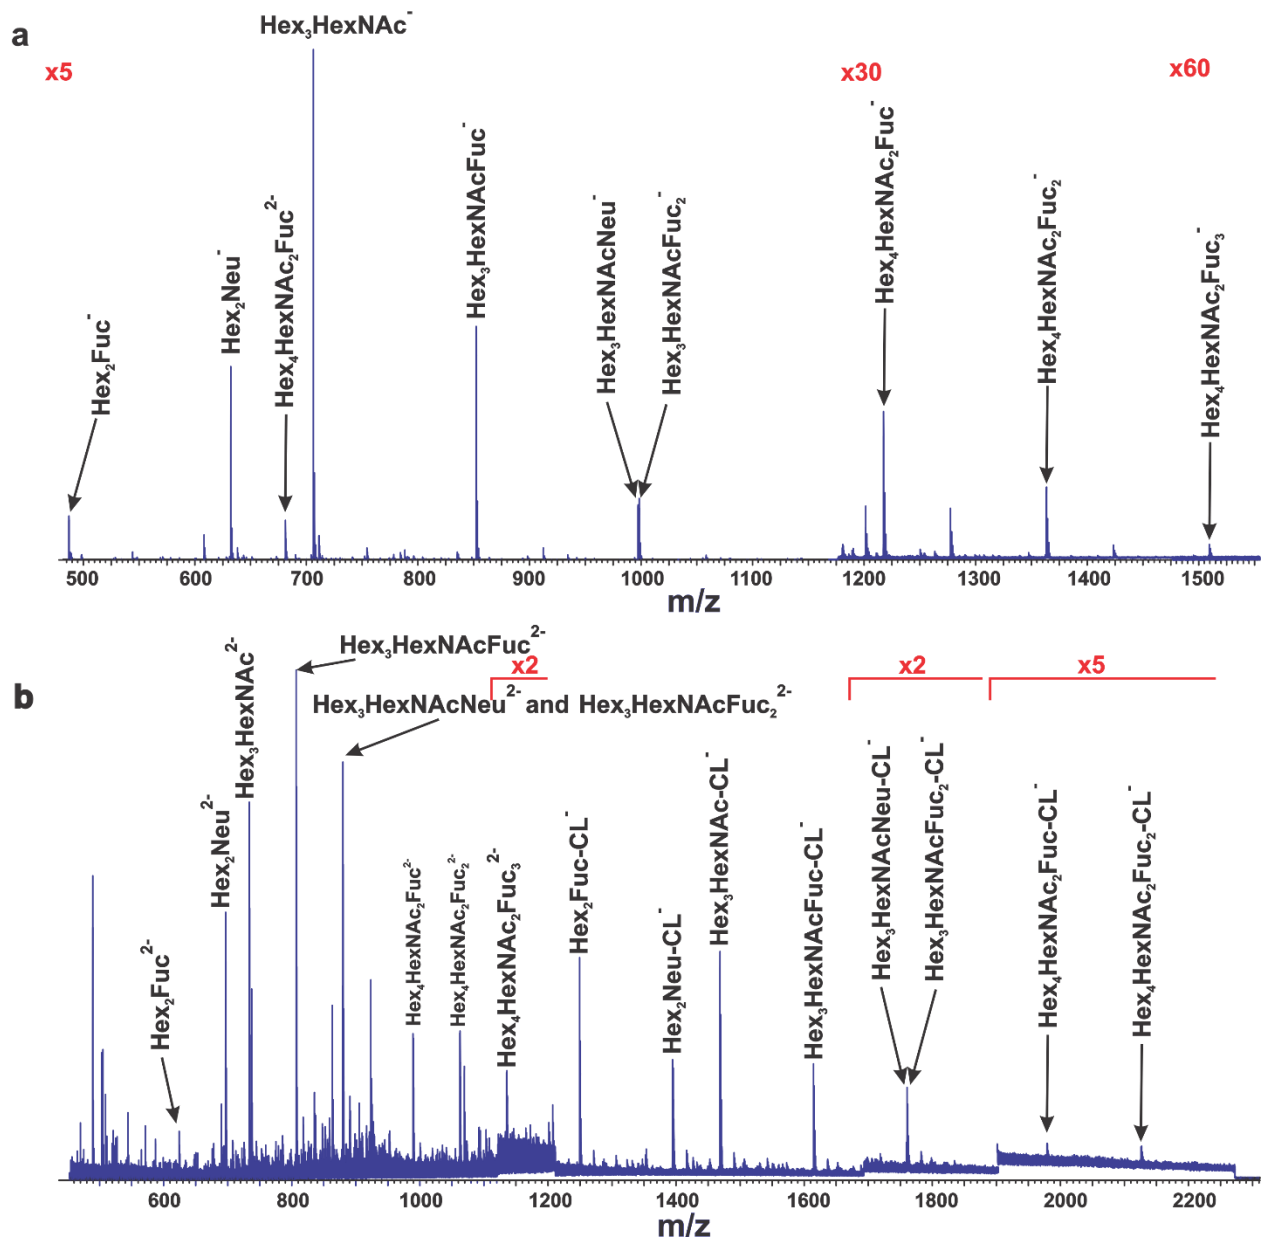

**Supplementary Figure 7.** ESI mass spectra of 200 mM aqueous ammonium acetate (pH 7) solution of 0.04 mg/ml HMO library before (a) and after (b) modification with CUPRA linker (CL).

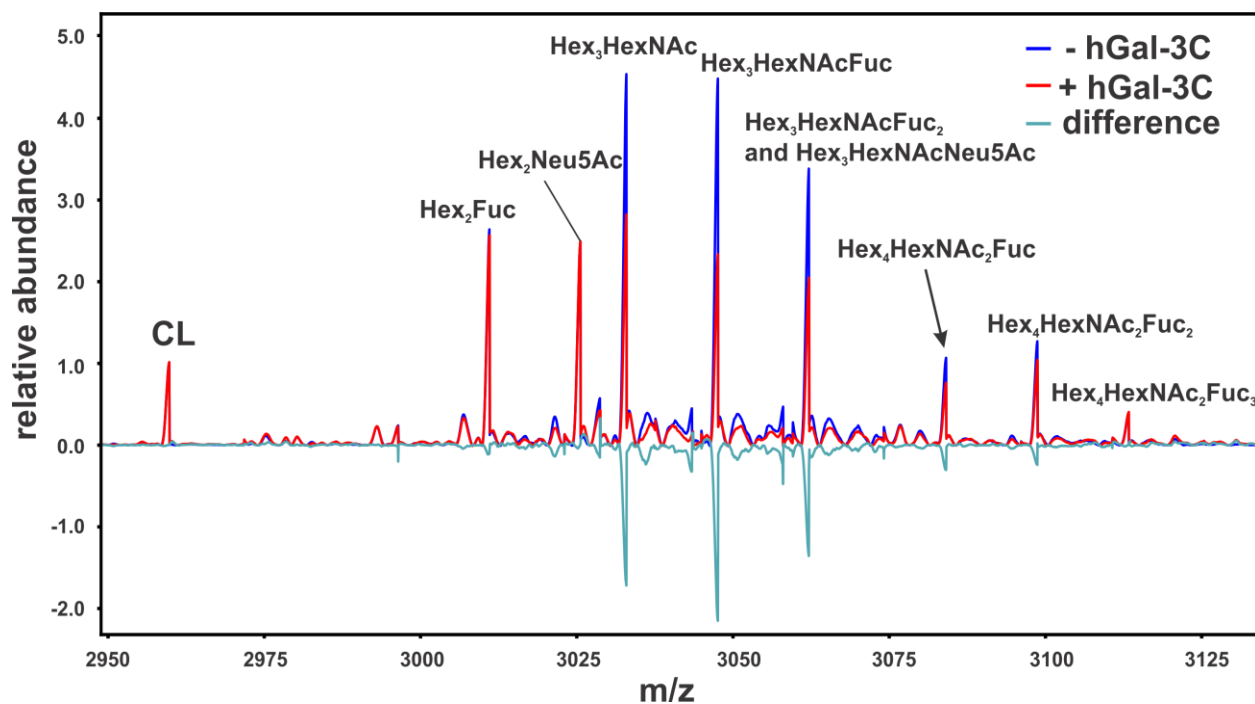

**Supplementary Figure 8.** Portion of ESI mass spectrum acquired for an aqueous ammonium acetate (200 mM, pH 7) solution of  $\text{UniP}_{\text{proxy}}$  (3  $\mu\text{M}$ ), a subset of the HMO library modified with CUPRA linker (CL) (0.08 mg/ml) and CUPRA linker (CL, 3  $\mu\text{M}$ ) in the absence (red trace) and presence (blue trace) of hGal-3C (40  $\mu\text{M}$ ). Cyan trace corresponds to difference between these two mass spectra. All mass spectra were treated with SWARM.



## Supplementary Tables

**Supplementary Table 1.** Structures of CUPRA library components (OS<sup>mod</sup>); **CL** (CUPRA linker moiety) represents the linker-affinity tag.

| OS <sup>mod</sup> | Structure                                                                                   |
|-------------------|---------------------------------------------------------------------------------------------|
| <b>ABH01</b>      | Gal $\beta$ 1-3GlcNAc-CL                                                                    |
| <b>ABH02</b>      | Gal $\alpha$ 1-3Gal $\beta$ 1-4GlcNAc-CL                                                    |
| <b>ABH03</b>      | Fuc $\alpha$ 1-2Gal $\beta$ 1-3GlcNAc $\beta$ 1-3Gal $\beta$ 1-4Glc-CL                      |
| <b>ABH04</b>      | Fuc $\alpha$ 1-2Gal $\beta$ 1-4GlcNAc $\beta$ 1-3Gal-CL                                     |
| <b>ABH05</b>      | Fuc $\alpha$ 1-2Gal $\beta$ 1-4GlcNAc $\beta$ 1-3Gal $\beta$ 1-4Glc-CL                      |
| <b>ABH06</b>      | Fuc $\alpha$ 1-2Gal $\beta$ 1-3GalNAc $\beta$ 1-3Gal-CL                                     |
| <b>ABH07</b>      | GalNAc $\alpha$ 1-3(Fuc $\alpha$ 1-2)Gal-CL                                                 |
| <b>ABH08</b>      | GalNAc $\alpha$ 1-3(Fuc $\alpha$ 1-2)Gal $\beta$ 1-3GlcNAc-CL                               |
| <b>ABH09</b>      | GalNAc $\alpha$ 1-3(Fuc $\alpha$ 1-2)Gal $\beta$ 1-3GlcNAc $\beta$ 1-3Gal-CL                |
| <b>ABH10</b>      | GalNAc $\alpha$ 1-3(Fuc $\alpha$ 1-2)Gal $\beta$ 1-3GlcNAc $\beta$ 1-3Gal $\beta$ 1-4Glc-CL |
| <b>ABH11</b>      | GalNAc $\alpha$ 1-3(Fuc $\alpha$ 1-2)Gal $\beta$ 1-4GlcNAc-CL                               |
| <b>ABH12</b>      | GalNAc $\alpha$ 1-3(Fuc $\alpha$ 1-2)Gal $\beta$ 1-4GlcNAc $\beta$ 1-3Gal-CL                |
| <b>ABH13</b>      | GalNAc $\alpha$ 1-3(Fuc $\alpha$ 1-2)Gal $\beta$ 1-4GlcNAc $\beta$ 1-3Gal $\beta$ 1-4Glc-CL |
| <b>ABH14</b>      | GalNAc $\alpha$ 1-3(Fuc $\alpha$ 1-2)Gal $\beta$ 1-3GalNAc $\beta$ 1-3Gal-CL                |
| <b>ABH15</b>      | GalNAc $\alpha$ 1-3(Fuc $\alpha$ 1-2)Gal $\beta$ 1-4Glc-CL                                  |
| <b>ABH16</b>      | Gal $\alpha$ 1-3(Fuc $\alpha$ 1-2)Gal $\beta$ 1-3GlcNAc-CL                                  |
| <b>ABH17</b>      | Gal $\alpha$ 1-3(Fuc $\alpha$ 1-2)Gal $\beta$ 1-3GlcNAc $\beta$ 1-3Gal-CL                   |
| <b>ABH18</b>      | Gal $\alpha$ 1-3(Fuc $\alpha$ 1-2)Gal $\beta$ 1-3GlcNAc $\beta$ 1-3Gal $\beta$ 1-4Glc-CL    |

|              |                                                                                                             |
|--------------|-------------------------------------------------------------------------------------------------------------|
| <b>ABH19</b> | Gal $\alpha$ 1-3(Fuc $\alpha$ 1-2)Gal $\beta$ 1-4GlcNAc-CL                                                  |
| <b>ABH20</b> | Gal $\alpha$ 1-3(Fuc $\alpha$ 1-2)Gal $\beta$ 1-4GlcNAc $\beta$ 1-3Gal-CL                                   |
| <b>ABH21</b> | Gal $\alpha$ 1-3(Fuc $\alpha$ 1-2)Gal $\beta$ 1-3GalNAc $\beta$ 1-3Gal-CL                                   |
| <b>GA01</b>  | Gal $\beta$ 1-3GalNAc $\beta$ 1-4(Neu5Ac $\alpha$ 2-3)Gal $\beta$ 1-4Glc-CL                                 |
| <b>GA02</b>  | Fuc $\alpha$ 1-2Gal $\beta$ 1-3GalNAc $\beta$ 1-4(Neu5Ac $\alpha$ 2-3)Gal $\beta$ 1-4Glc-CL                 |
| <b>GA03</b>  | Neu5Ac $\alpha$ 2-3Gal $\beta$ 1-3GalNAc $\beta$ 1-4Gal $\beta$ 1-4Glc-CL                                   |
| <b>GA04</b>  | GalNAc $\beta$ 1-4Gal $\beta$ 1-4Glc-CL                                                                     |
| <b>GA05</b>  | Gal $\beta$ 1-3GalNAc $\beta$ 1-4Gal $\beta$ 1-4Glc-CL                                                      |
| <b>GA06</b>  | Neu5Ac $\alpha$ 2-8Neu5Ac $\alpha$ 2-3Gal $\beta$ 1-4Glc-CL                                                 |
| <b>GA07</b>  | GalNAc $\beta$ 1-4(Neu5Ac $\alpha$ 2-3)Gal $\beta$ 1-4Glc-CL                                                |
| <b>GA08</b>  | Gal $\beta$ 1-4(Neu5Ac $\alpha$ 2-3)Gal $\beta$ 1-4Glc-CL                                                   |
| <b>GA09</b>  | Gal $\beta$ 1-3GalNAc $\beta$ 1-4(Neu5Ac $\alpha$ 2-8Neu5Ac $\alpha$ 2-3)Gal $\beta$ 1-4Glc-CL              |
| <b>GA10</b>  | GalNAc $\beta$ 1-4(Neu5Ac $\alpha$ 2-8 Neu5Ac $\alpha$ 2-3)Gal $\beta$ 1-4Glc-CL                            |
| <b>GL01</b>  | Gal $\alpha$ 1-4Gal $\beta$ 1-4GlcNAc-CL                                                                    |
| <b>GL02</b>  | GalNAc $\beta$ 1-3Gal $\alpha$ 1-4Gal $\beta$ 1-4Glc-CL                                                     |
| <b>GL03</b>  | Gal $\beta$ 1-3GalNAc $\beta$ 1-3Gal $\alpha$ 1-4Gal $\beta$ 1-4Glc-CL                                      |
| <b>GL04</b>  | GalNAc $\alpha$ 1-3GalNAc $\beta$ 1-3Gal-CL                                                                 |
| <b>GL05</b>  | GalNAc $\alpha$ 1-3GalNAc $\beta$ 1-3Gal $\alpha$ 1-4Gal $\beta$ 1-4Glc-CL                                  |
| <b>GL06</b>  | Gal $\alpha$ 1-4Gal $\beta$ 1-4Glc-CL                                                                       |
| <b>GL07</b>  | Neu5Ac $\alpha$ 2-3Gal $\alpha$ -4Gal $\beta$ -4Glc-CL                                                      |
| <b>GL08</b>  | Neu5Ac $\alpha$ 2-3Gal $\beta$ 1-3GalNAc $\beta$ 1-3Gal $\alpha$ 1-4Gal $\beta$ 1-4Glc-CL                   |
| <b>GL09</b>  | Fuc $\alpha$ 1-2Gal $\beta$ 1-3GalNAc $\beta$ 1-3Gal $\alpha$ 1-4Gal $\beta$ 1-4Glc-CL                      |
| <b>GL10</b>  | GalNAc $\alpha$ 1-3(Fuc $\alpha$ 1-2)Gal $\beta$ 1-3GalNAc $\beta$ 1-3Gal $\alpha$ 1-4Gal $\beta$ 1-4Glc-CL |

|              |                                                                                                          |
|--------------|----------------------------------------------------------------------------------------------------------|
| <b>GL11</b>  | Gal $\alpha$ 1-3(Fuc $\alpha$ 1-2)Gal $\beta$ 1-3GalNAc $\beta$ 1-3Gal $\alpha$ 1-4Gal $\beta$ 1-4Glc-CL |
| <b>HMO01</b> | Gal $\beta$ 1-4Glc-CL                                                                                    |
| <b>HMO02</b> | Gal $\beta$ 1-3GlcNAc $\beta$ 1-3Gal $\beta$ 1-4Glc-CL                                                   |
| <b>HMO03</b> | Neu5Ac $\alpha$ 2-3Gal $\beta$ 1-4Glc-CL                                                                 |
| <b>HMO04</b> | Fuc $\alpha$ 1-2Gal $\beta$ 1-4(Fuc $\alpha$ 1-2)Glc-CL                                                  |
| <b>HMO05</b> | Fuc $\alpha$ 1-2Gal $\beta$ 1-4Glc-CL                                                                    |
| <b>HMO06</b> | Gal $\beta$ 1-4(Fuc $\alpha$ 1-3)Glc-CL                                                                  |
| <b>HMO07</b> | Gal $\beta$ 1-4GlcNAc $\beta$ 1-3Gal $\beta$ 1-4Glc-CL                                                   |
| <b>HMO08</b> | Neu5Ac $\alpha$ 2-6Gal $\beta$ 1-4Glc-CL                                                                 |
| <b>HMO09</b> | GlcA $\beta$ 1-3Gal $\beta$ 1-3GlcNAc $\beta$ 1-3Gal $\beta$ 1-4Glc-CL                                   |
| <b>LE01</b>  | Gal $\beta$ 1-3(Fuc $\alpha$ 1-4)GlcNAc-CL                                                               |
| <b>LE02</b>  | Gal $\beta$ 1-3(Fuc $\alpha$ 1-4)GlcNAc $\beta$ 1-3Gal-CL                                                |
| <b>LE03</b>  | Gal $\beta$ 1-3(Fuc $\alpha$ 1-4)GlcNAc $\beta$ 1-3Gal $\beta$ 1-4(Fuc $\alpha$ 1-3)Glc-CL               |
| <b>LE04</b>  | Fuc $\alpha$ 1-2Gal $\beta$ 1-3(Fuc $\alpha$ 1-4)GlcNAc-CL                                               |
| <b>LE05</b>  | Fuc $\alpha$ 1-2Gal $\beta$ 1-3(Fuc $\alpha$ 1-4)GlcNAc $\beta$ 1-3Gal-CL                                |
| <b>LE06</b>  | Gal $\beta$ 1-4(Fuc $\alpha$ 1-3)GlcNAc-CL                                                               |
| <b>LE07</b>  | Gal $\beta$ 1-4(Fuc $\alpha$ 1-3)GlcNAc $\beta$ 1-3Gal-CL                                                |
| <b>LE08</b>  | Neu5Ac $\alpha$ 2-3Gal $\beta$ 1-4(Fuc $\alpha$ 1-3)GlcNAc $\beta$ 1-3Gal-CL                             |
| <b>LE09</b>  | Gal $\beta$ 1-4(Fuc $\alpha$ 1-3)GlcNAc $\beta$ 1-3Gal $\beta$ 1-4(Fuc $\alpha$ 1-3)Glc-CL               |
| <b>LE10</b>  | Fuc $\alpha$ 1-2Gal $\beta$ 1-4(Fuc $\alpha$ 1-3)GlcNAc $\beta$ 1-3Gal-CL                                |
| <b>LE11</b>  | Fuc $\alpha$ 1-2Gal $\beta$ 1-4(Fuc $\alpha$ 1-3)GlcNAc-CL                                               |
| <b>P01</b>   | Glc $\alpha$ 1-4Glc-CL                                                                                   |
| <b>P02</b>   | Glc $\beta$ 1-4Glc-CL                                                                                    |

- P03** Gal $\alpha$ 1-6Glc-CL
- P04** Glc $\alpha$ 1-6Glc $\alpha$ 1-6Glc-CL

**Supplementary Table 2.** Affinities ( $K_d$ ) of OS<sup>mod</sup> for UniP<sub>proxy</sub> measured by ESI-MS.<sup>a,b</sup>

| <b>OS<sup>mod</sup></b> | <b><math>K_d</math> (<math>\mu</math>M)</b> | <b>OS<sup>mod</sup></b> | <b><math>K_d</math> (<math>\mu</math>M)</b> |
|-------------------------|---------------------------------------------|-------------------------|---------------------------------------------|
| <b>ABH01</b>            | 11.9 $\pm$ 0.7                              | <b>GA01</b>             | 10.3 $\pm$ 3.5                              |
| <b>ABH02</b>            | 16.4 $\pm$ 1.8                              | <b>GA10</b>             | 14.1 $\pm$ 1.9                              |
| <b>ABH03</b>            | 9.9 $\pm$ 3.2                               | <b>GA02</b>             | 18.7 $\pm$ 1.2                              |
| <b>ABH04</b>            | 9.2 $\pm$ 2.6                               | <b>GA03</b>             | 5.5 $\pm$ 1.7                               |
| <b>ABH05</b>            | 12.7 $\pm$ 3.8                              | <b>GA04</b>             | 10.8 $\pm$ 2.4                              |
| <b>ABH06</b>            | 4.1 $\pm$ 0.2                               | <b>GA05</b>             | 7.9 $\pm$ 1.0                               |
| <b>ABH07</b>            | 12.1 $\pm$ 2.4                              | <b>GA06</b>             | 26.4 $\pm$ 0.8                              |
| <b>ABH08</b>            | 18.4 $\pm$ 2.2                              | <b>GA07</b>             | 6.5 $\pm$ 0.3                               |
| <b>ABH09</b>            | 19.4 $\pm$ 2.9                              | <b>GA08</b>             | 12.4 $\pm$ 2.6                              |
| <b>ABH10</b>            | 15.8 $\pm$ 2.5                              | <b>GA09</b>             | 32.7 $\pm$ 1.2                              |
| <b>ABH11</b>            | 15.2 $\pm$ 0.8                              | <b>GL01</b>             | 10.4 $\pm$ 0.4                              |
| <b>ABH12</b>            | 22.4 $\pm$ 6.9                              | <b>GL02</b>             | 7.6 $\pm$ 1.5                               |
| <b>ABH13</b>            | 11.5 $\pm$ 3.0                              | <b>GL03</b>             | 7.4 $\pm$ 0.7                               |
| <b>ABH14</b>            | 4.7 $\pm$ 0.8                               | <b>GL04</b>             | 8.6 $\pm$ 0.9                               |
| <b>ABH15</b>            | 8.6 $\pm$ 3.7                               | <b>GL05</b>             | 6.9 $\pm$ 0.2                               |
| <b>ABH16</b>            | 32.9 $\pm$ 8.3                              | <b>GL06</b>             | 4.2 $\pm$ 0.8                               |
| <b>ABH17</b>            | 8.8 $\pm$ 2.2                               | <b>GL07</b>             | 14.0 $\pm$ 1.3                              |
| <b>ABH18</b>            | 16.0 $\pm$ 2.8                              | <b>GL08</b>             | 10.3 $\pm$ 1.3                              |
| <b>ABH19</b>            | 10.6 $\pm$ 2.4                              | <b>GL09</b>             | 18.1 $\pm$ 2.1                              |
| <b>ABH20</b>            | 13.0 $\pm$ 4.7                              | <b>GL10</b>             | 4.7 $\pm$ 0.4                               |
| <b>ABH21</b>            | 4.1 $\pm$ 0.8                               | <b>GL11</b>             | 7.9 $\pm$ 0.7                               |
| <b>HMO01</b>            | 5.1 $\pm$ 1.4                               | <b>LE04</b>             | 48.5 $\pm$ 5.0                              |

| <b>OS<sup>mod</sup></b> | <b>K<sub>a</sub> (μM)</b> | <b>OS<sup>mod</sup></b> | <b>K<sub>a</sub> (μM)</b> |
|-------------------------|---------------------------|-------------------------|---------------------------|
| <b>HMO02</b>            | 6.6 ± 0.7                 | <b>LE05</b>             | 40.2 ± 13.0               |
| <b>HMO03</b>            | 4.0 ± 0.7                 | <b>LE06</b>             | 13.0 ± 4.4                |
| <b>HMO04</b>            | 6.0 ± 0.2                 | <b>LE07</b>             | 10.4 ± 2.6                |
| <b>HMO05</b>            | 12.1 ± 0.9                | <b>LE08</b>             | 11.6 ± 4.6                |
| <b>HMO06</b>            | 7.2 ± 1.2                 | <b>LE09</b>             | 43.3 ± 12.7               |
| <b>HMO07</b>            | 2.2 ± 0.5                 | <b>LE10</b>             | 9.0 ± 2.8                 |
| <b>HMO08</b>            | 14.6 ± 2.1                | <b>LE11</b>             | 8.5 ± 3.6                 |
| <b>HMO09</b>            | 10.6 ± 1.4                | <b>P01</b>              | 1.7 ± 0.6                 |
| <b>LE01</b>             | 15.9 ± 3.4                | <b>P02</b>              | 8.9 ± 1.5                 |
| <b>LE02</b>             | 11.9 ± 4.0                | <b>P03</b>              | 6.6 ± 2.0                 |
| <b>LE03</b>             | 8.1 ± 2.7                 | <b>P04</b>              | 5.9 ± 0.3                 |

a. Errors correspond to one standard deviation. b. Affinities measured in 200 mM aqueous ammonium acetate (pH 7, 25 °C).

**Supplementary Table 3.** Affinities ( $K_d$ ) of OS<sup>mod</sup> for GBPs measured by CUPRA and affinities of the corresponding OS for the GBPs.<sup>a,b</sup>

| <b>GBP</b>       | <b>OS<sup>mod</sup></b> | <b>T (°C)</b> | <b><math>K_d</math> (OS<sup>mod</sup>) (<math>\mu</math>M)</b> | <b><math>K_d</math> (OS) (<math>\mu</math>M)</b> |
|------------------|-------------------------|---------------|----------------------------------------------------------------|--------------------------------------------------|
| SNA              | <b>HMO08</b>            | 25            | $0.43 \pm 0.01$                                                | NA <sup>g</sup>                                  |
| MAA              | <b>HMO03</b>            | 25            | $15 \pm 1$                                                     | NA <sup>g</sup>                                  |
| MAA              | <b>GA06</b>             | 25            | $8.3 \pm 0.1$                                                  | NA <sup>g</sup>                                  |
| CTB <sub>5</sub> | <b>GA01</b>             | 25            | $0.66 \pm 0.01$                                                | $0.31 \pm 0.03$ <sup>c</sup>                     |
| CTB <sub>5</sub> | <b>GA02</b>             | 25            | $45 \pm 4$                                                     | $135 \pm 4$                                      |
| CBM51            | <b>ABH11</b>            | 25            | $96 \pm 10$                                                    | $14.3 \pm 0.8$ <sup>d</sup>                      |
| CBM51            | <b>ABH12</b>            | 25            | $110 \pm 10$                                                   | $38 \pm 3$                                       |
| CBM51            | <b>ABH13</b>            | 25            | $170 \pm 40$                                                   | $40 \pm 8$                                       |
| CBM51            | <b>ABH15</b>            | 25            | $100 \pm 10$                                                   | $17.2 \pm 0.6$ <sup>d</sup>                      |
| CBM51            | <b>ABH19</b>            | 25            | $97 \pm 18$                                                    | $17.2 \pm 1.2$ <sup>d</sup>                      |
| CBM51            | <b>ABH20</b>            | 25            | $92 \pm 12$                                                    | $38 \pm 5$                                       |
| siglec-2         | <b>HMO08</b>            | 25            | $110 \pm 20$                                                   | $281 \pm 10$ <sup>e,f</sup>                      |
| siglec-2         | <b>HMO08</b>            | 0             | $43 \pm 10$                                                    | NA <sup>g</sup>                                  |

a. Errors correspond to one standard deviation. b. Unless otherwise noted, affinities were measured in 200 mM aqueous ammonium acetate (pH 7) by ESI-MS. c. Values taken from Lin et al. *J. Am. Soc. Mass Spectrom.* **25**, 104–110 (2014). d. Values taken from Han et al. *Glycobiology* **27**, 170–180 (2015). e. Measured by ITC in aqueous solution (pH 8.0) of 20 mM Tris and 150 mM NaCl. f. Value taken from Ereño-Orbea, J. et al. *Nat. Commun.* **8**, 764 (2017). g. NA  $\equiv$  Not available.

**Supplementary Table 4.** List of MWs and saccharide compositions of extracted HMOs before and after introduction of CUPRA linker (CL).

| HMO                                                       | MW (theoretical) | MW (experimental) <sup>a</sup> |
|-----------------------------------------------------------|------------------|--------------------------------|
| Hex <sub>2</sub> FucOH                                    | 488.17           | 488.18 ± 0.01                  |
| Hex <sub>2</sub> Fuc-CL                                   | 1250.52          | 1250.51 ± 0.02                 |
| Hex <sub>2</sub> Neu5AcOH                                 | 633.21           | 633.22 ± 0.01                  |
| Hex <sub>2</sub> Neu5Ac-CL                                | 1395.55          | 1395.55 ± 0.02                 |
| Hex <sub>3</sub> HexNAcOH                                 | 707.25           | 707.26 ± 0.01                  |
| Hex <sub>3</sub> HexNAc-CL                                | 1469.59          | 1469.58 ± 0.02                 |
| Hex <sub>3</sub> HexNAcFucOH                              | 853.31           | 853.32 ± 0.01                  |
| Hex <sub>3</sub> HexNAcFuc-CL                             | 1615.65          | 1615.64 ± 0.02                 |
| Hex <sub>3</sub> HexNAcNeu5AcOH                           | 998.34           | 998.35 ± 0.01                  |
| Hex <sub>3</sub> HexNAcNeu5Ac-CL                          | 1760.68          | 1760.68 ± 0.03                 |
| Hex <sub>3</sub> HexNAcFuc <sub>2</sub> OH                | 999.36           | 999.37 ± 0.01                  |
| Hex <sub>3</sub> HexNAcFuc <sub>2</sub> -CL               | 1761.71          | 1761.70 ± 0.03                 |
| Hex <sub>4</sub> HexNAc <sub>2</sub> FucOH                | 1218.44          | 1218.45 ± 0.01                 |
| Hex <sub>4</sub> HexNAc <sub>2</sub> Fuc-CL               | 1980.78          | 1980.78 ± 0.03                 |
| Hex <sub>4</sub> HexNAc <sub>2</sub> Fuc <sub>2</sub> OH  | 1364.50          | 1364.52 ± 0.01                 |
| Hex <sub>4</sub> HexNAc <sub>2</sub> Fuc <sub>2</sub> -CL | 2126.84          | 2126.82 ± 0.03                 |
| Hex <sub>4</sub> HexNAc <sub>2</sub> Fuc <sub>3</sub> OH  | 1510.55          | 1510.56 ± 0.01                 |
| Hex <sub>4</sub> HexNAc <sub>2</sub> Fuc <sub>3</sub> -CL | 2272.90          | 2272.87 ± 0.04                 |

a. Errors correspond to one standard deviation.



**Supplementary Table 5.** Apparent concentrations of modified (with CUPRA linker, CL) HMOs estimated from their binding to  $^{31}\text{P}$  proxy measured by ESI-MS and their apparent affinities ( $K_d$ ,  $\mu\text{M}$ ) to hGal-3C measured by CUPRA. <sup>a,b</sup>

| HMO                                                       | Initial concentrations ( $\mu\text{M}$ ) <sup>c</sup> | $K_d$ ( $\mu\text{M}$ ) |
|-----------------------------------------------------------|-------------------------------------------------------|-------------------------|
| Hex <sub>2</sub> Fuc-CL                                   | 9.0 ± 0.1                                             | NB                      |
| Hex <sub>2</sub> Neu5Ac-CL                                | 8.4 ± 0.1                                             | NB                      |
| Hex <sub>3</sub> HexNAc-CL                                | 15 ± 1                                                | 31 ± 4                  |
| Hex <sub>3</sub> HexNAcFuc-CL                             | 15 ± 1                                                | 2.5 ± 0.5               |
| Hex <sub>3</sub> HexNAcNeu5Ac-CL <sup>d</sup>             | 8.8 ± 0.2                                             | 20 ± 3                  |
| Hex <sub>3</sub> HexNAcFuc <sub>2</sub> -CL <sup>d</sup>  | 8.8 ± 0.2                                             | 20 ± 3                  |
| Hex <sub>4</sub> HexNAc <sub>2</sub> Fuc-CL               | 2.9 ± 0.1                                             | 29 ± 3                  |
| Hex <sub>4</sub> HexNAc <sub>2</sub> Fuc <sub>2</sub> -CL | 3.5 ± 0.1                                             | 87 ± 5                  |
| Hex <sub>4</sub> HexNAc <sub>2</sub> Fuc <sub>3</sub> -CL | 1.2 ± 0.1                                             | NB                      |

a. Errors correspond to one standard deviation. b. Affinities measured in 200 mM aqueous ammonium acetate (pH 7, 25 °C). c. Values represent apparent concentrations corresponding to all HMOs of same MW (isomer set). d. Due to the small difference in MW, these two HMO isomer sets were treated as a single set.

**Supplementary Table 6.** Relative activities of sialylated OS<sup>mod</sup> substrates measured by time-resolved CUPRA for NEU2 and NEU3 in 200 mM aqueous ammonium acetate (pH 7, 25 °C).

| <b>Substrate</b> | <b>NEU2</b> | <b>NEU3</b> |
|------------------|-------------|-------------|
| <b>GA01</b>      | 0.000       | 0.008       |
| <b>GA02</b>      | 0.000       | 0.000       |
| <b>GA03</b>      | 0.524       | 0.551       |
| <b>GA06</b>      | 0.443       | 0.298       |
| <b>GA07</b>      | 0.000       | 0.009       |
| <b>GA08</b>      | 0.000       | 0.034       |
| <b>GA09</b>      | 0.000       | 0.247       |
| <b>GA10</b>      | 0.000       | 0.292       |
| <b>GL07</b>      | 0.000       | 0.462       |
| <b>GL08</b>      | 0.918       | 0.523       |
| <b>HMO03</b>     | 1.000       | 1.000       |
| <b>HMO08</b>     | 0.004       | 0.275       |
| <b>LE08</b>      | 0.188       | 0.494       |
